# Supplementary material
Source: HighWire-hosted journal article supplement (https://erj.ersjournals.com/content/56/3/2002281)
Supplement: inline-supplementary-material-1 [file inline-supplementary-material-1.pdf]

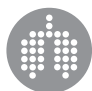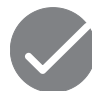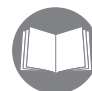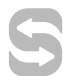

SHAREABLE PDF

# Pandemic treatments on trial: the bigger picture.

## *N of many thinking in an N of one scenario*

Tom Kotsimbos<sup>1</sup> and Marc Humbert <sup>2</sup>

**Affiliations:** <sup>1</sup>Allergy, Immunology and Respiratory Medicine, Dept of Medicine, Central and Eastern Clinical School, Monash University, The Alfred Hospital, Melbourne, Australia. <sup>2</sup>Service de Pneumologie, Hôpital Bicêtre, APHP, Université Paris-Sud, Le Kremlin Bicêtre, France.

**Correspondence:** Tom Kotsimbos, Allergy, Immunology and Respiratory Medicine, Dept of Medicine, Central and Eastern Clinical School, Monash University, The Alfred Hospital, Commercial Rd Prahran, Melbourne, Victoria 3004, Australia. E-mail: tom.kotsimbos@monash.edu

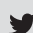

@ERSpublications

The tension between immediately using any potentially useful novel therapy in COVID-19 and trialling all novel therapies as rigorously as possible is addressed from a bigger picture perspective. <https://bit.ly/3fZVuxg>

**Cite this article as:** Kotsimbos T, Humbert M. Pandemic treatments on trial: the bigger picture. *N of many thinking in an N of one scenario*. *Eur Respir J* 2020; 56: 2002281 [<https://doi.org/10.1183/13993003.02281-2020>].

This single-page version can be shared freely online.

*Confusion of goals and perfection of means seems to characterize our age* — Albert Einstein

*Wisdom don't consist in knowing more that iz new, but in knowing less that is false* — Josh Billings
